# Supplementary material
Source: publisher figshare collection journal article supplement (https://acs.figshare.com/ndownloader/files/14259917)
Supplement: Supplementary file 1 [file 14259917]

## Supporting Information

# Hollow Multi-Shelled Structures of $\text{Co}_3\text{O}_4$ Dodecahedron with Unique Crystal Orientation for Enhanced Photocatalytic $\text{CO}_2$ Reduction

Li Wang<sup>†, ‡, #</sup>, Jiawei Wan<sup>‡, #</sup>, Yasong Zhao<sup>†, ‡</sup>, Nailiang Yang<sup>‡, &</sup> and Dan Wang<sup>†, ‡, &, \*</sup>

<sup>†</sup> School of Chemistry and Chemical Engineering, Harbin Institute of Technology, Harbin, 150001, P. R. China

<sup>‡</sup> State Key Laboratory of Biochemical Engineering, Institute of Process Engineering, Chinese Academy of Sciences, Beijing 100190, P. R. China

<sup>&</sup> University of Chinese Academy of Sciences, Beijing 100049, P. R. China

<sup>\*</sup> Corresponding author: E-mail: danwang@ipe.ac.cn (D. Wang).

<sup>#</sup>These authors contributed equally to this work.

## Experimental Section

*Reagents:* All reagents used were of analytical grade and were used as received without any further purification.  $\text{Co}(\text{NO}_3)_2 \cdot 6\text{H}_2\text{O}$  was purchased from Aladdin Reagent. Dimethyl imidazole was purchased from Aladdin Reagent. Carbon dioxide gas was supplied by Beijing Chengxin Shunxing Gas Raw Material Sales Co., Ltd. Ultrapure water with a resistivity of  $18.2 \text{ M}\Omega$  was used in all experiments.

*Synthesis of ZIF-67 crystal.:* All the chemicals were directly used after purchased without further purification. In a typical synthesis of 700-800 nm ZIF-67, two solutions were first prepared by dissolving 7.50 mmol of  $\text{Co}(\text{NO}_3)_2 \cdot 6\text{H}_2\text{O}$  and 32.3 mmol of 2-methylimidazole in mixed solution of 20 ml ethanol and 20 ml methanol. Then, the solution of 2-methylimidazole was quickly poured into the solution of  $\text{Co}(\text{NO}_3)_2$  and the resultant mixed solution was aged for 24 h at room temperature. The purple precipitate was collected by centrifugation and dried at  $70^\circ\text{C}$  for 8 h. The size of ZIF-67 particles can be easily modulated by varying the amount of 2-methylimidazole and the age temperature with other conditions unchanged. When the molar amount of dimethylimidazole is 16.1 mmol, ZIF-67 of 500-600 nm is obtained, and when the aging temperature is  $40^\circ\text{C}$ ,  $2.5 \mu\text{m}$  ZIF-67 is obtained.

*Synthesis of multi-shelled  $\text{Co}_3\text{O}_4$ :* DS and TS  $\text{Co}_3\text{O}_4$  HoMSs were obtained by annealing the as obtained 700-800 nm and  $2.5 \mu\text{m}$  ZIF-67 in the air at  $425^\circ\text{C}$  for 1 h with a ramp rate of  $0.5^\circ\text{C min}^{-1}$ . QS  $\text{Co}_3\text{O}_4$  HoMSs was obtained by annealing the as obtained  $2.5 \mu\text{m}$  ZIF-67 under the gas condition ( $\text{O}_2:\text{N}_2=1:9$ ) at  $425^\circ\text{C}$  for 1 h with a ramp rate of  $0.5^\circ\text{C min}^{-1}$ .

*Synthesis of QS  $\text{Co}_3\text{O}_4$  with the template CMS:*  $10 \mu\text{m}$  carbon microspheres were synthesized by dissolving 40 mg cobalt acetate and 2.7 g glucose in 30 ml deionized water, and then placing the solvent in a reaction vessel at  $180^\circ\text{C}$  for 5 h. QS  $\text{Co}_3\text{O}_4$  HoMSs were synthesized through STA (sequential templating approach) as described elsewhere<sup>1</sup> with  $10 \mu\text{m}$  CMSs.

*Photocatalytic test:* In a typical  $\text{CO}_2$  photocatalytic reduction process, 5 mg of sample was initially dispersed in deionized water and then the dispersions were dripped onto the quartz glass ( $2 \times 2 \text{ cm}^2$ ). After natural drying in the air, the quartz glass and 0.5 mL deionized water were put in a 100 mL high pressure reactor equipped with a quartz glass on the top. The reaction system was vacuumed-treated for five times, then pumped by high-purity  $\text{CO}_2$  (99.999%) to reach 3 MPa pressure with  $\text{H}_2\text{O}$  vapor to reach an atmospheric pressure. The

light source for the photocatalysis was a 200 W Xe lamp with a standard AM 1.5 filter and a 780 nm reflector, in which the light density was about 100 mW/cm<sup>2</sup> by calibrating with an NREL-calibrated Si solar cell. During the reaction, 10 uL product gases was extracted, injected into and analyzed by the online Shimadzu gas chromatography (GC-2014 ATFSPL, 230 C) equipping flame ionization detector (FID Porapak N, 3 mm×2 m) and thermal conductivity detector (TCD Molecular sieve 13 X, 3 mm×2 m).

*Characterization:* Transmission electron microscopy (TEM), high-resolution TEM (HRTEM) and selected area electron diffraction (SAED) were performed on a FEI Tecnai G2 F20 electron microscope operated at 200 KV with the software package for automated electron tomography, and the morphology was observed under Hitachi S-4800 electron scanning electron microscope (SEM). Powder X-ray diffraction (XRD) patterns were recorded on Panaltical X'Pert-pro MPD X-ray power diffractometer, using Cu K $\alpha$  radiation ( $\lambda=1.54056$  Å). UV-Vis spectra were recorded on a Hitachi Model U-4100 spectrophotometer, and the raw data was calculated by Kubelka-Munk model. The nitrogen adsorption-desorption isotherms under liquid nitrogen (-196 °C) were measured on a Quantochrom Autosorb-1 MP sorption analyzer with prior degassing under vacuum. XPS data were corrected with reference to C 1s (284.8 eV). Mott-Schottky measurements, electrochemical impedance spectroscopy (EIS) and time-resolved photo-current behaviors were performed on the electrochemical workstation (CH Instruments Ins.) in a 3-electrode configuration with the assembled photoelectrodes (hollow multi-shelled Co<sub>3</sub>O<sub>4</sub> using ZIF-67 as the template) as the working electrode, the Pt slice as the counter electrode and the SCE as the reference electrode, and 0.1 M Na<sub>2</sub>SO<sub>4</sub> solution was used as the electrolyte. For photo-current behaviors, a 300 Xelamp (FX-300, Beijing Perfectlight Technology Co. Ltd.) with the current of 13 A was the light source. Thermogravimetric analysis (TGA) was performed under atmospheric environment using a Netzsch TG209F3 TGA system. Fourier transform-infrared (FT-IR) spectroscopy was performed using a PerkinElmer Spectrum One spectrometer.

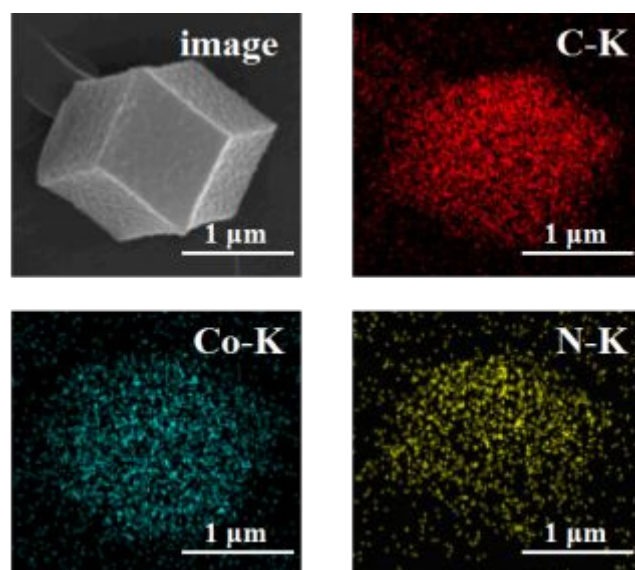

**Fig S1.** SEM mapping images of 2.5  $\mu\text{m}$  ZIF-67.

Take 2.5  $\mu\text{m}$  ZIF-67 as an example, Co, N, and C are distributed in the template uniformly.

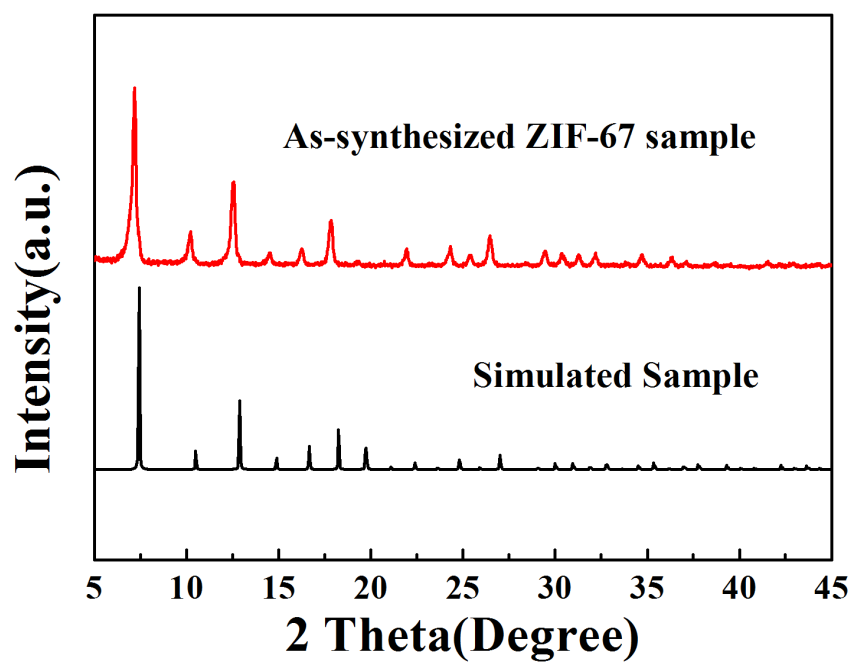

**Figure S2.** XRD patterns of simulated ZIF-67 and as-synthesized ZIF-67.

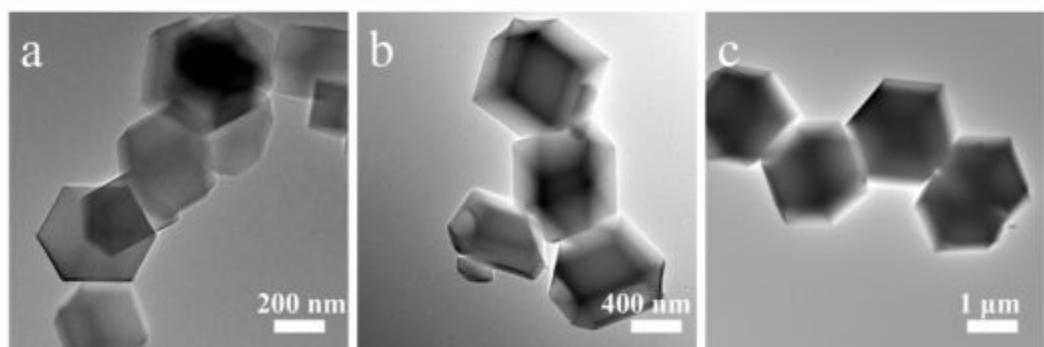

**Figure S3.** TEM images of (a) 400-500 nm ZIF-67, (b) 700-800 nm ZIF-67, (c) 2.5 μm ZIF-67.

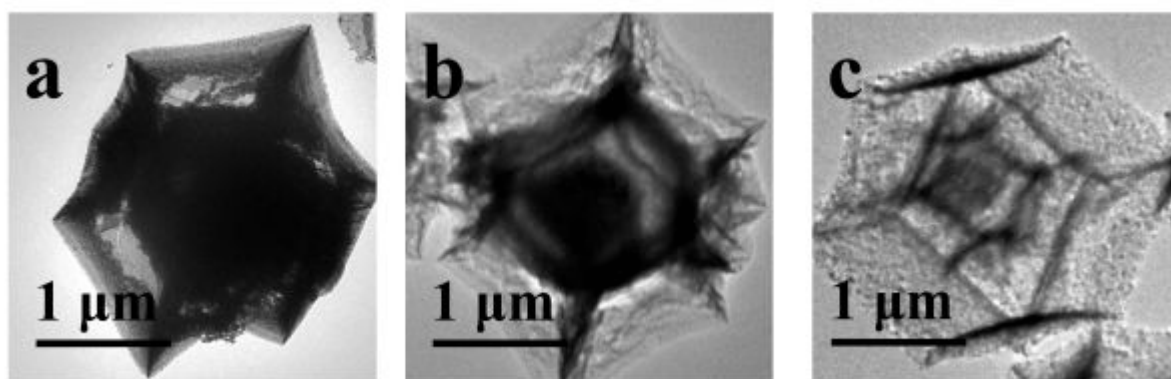

**Figure S4.** TEM images of 2  $\mu\text{m}$   $\text{Co}_3\text{O}_4$  produced with different heating rate in the air at 425  $^{\circ}\text{C}$  for 1 h, (a) 10  $^{\circ}\text{C}/\text{min}$ , (b) 5  $^{\circ}\text{C}/\text{min}$ , (c) 0.5  $^{\circ}\text{C}/\text{min}$ .

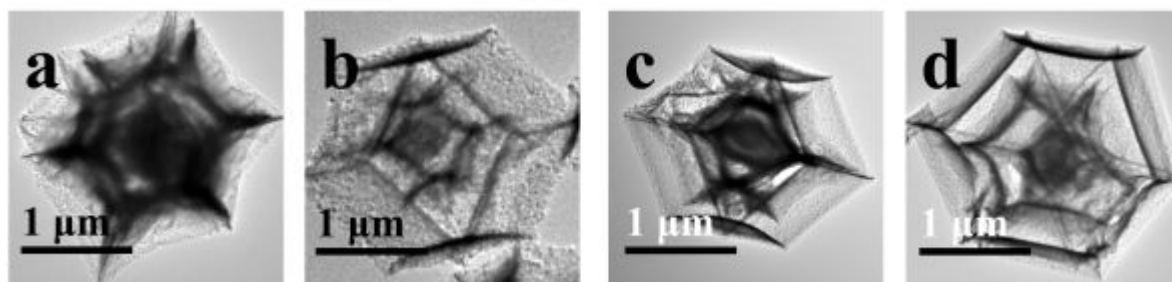

**Figure S5.** TEM images of 2  $\mu\text{m}$   $\text{Co}_3\text{O}_4$  produced at 425  $^\circ\text{C}$  for 1 h with the heating rate of 0.5  $^\circ\text{C}/\text{min}$  under different gas conditions,  $\text{O}_2:\text{N}_2$ = (a) 1:1, (b) 1:4, (c) 1:9, (d) 1:19.



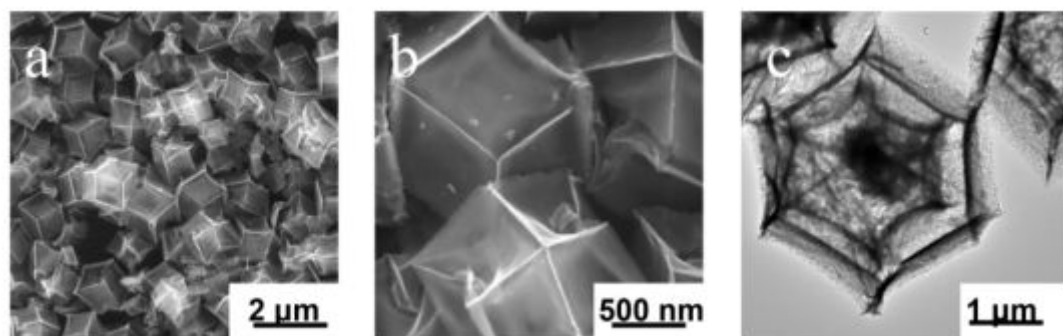

**Figure S6.** (a) SEM image, (b) magnified SEM image and (c)TEM image of TS-Co<sub>3</sub>O<sub>4</sub> HoMSs.

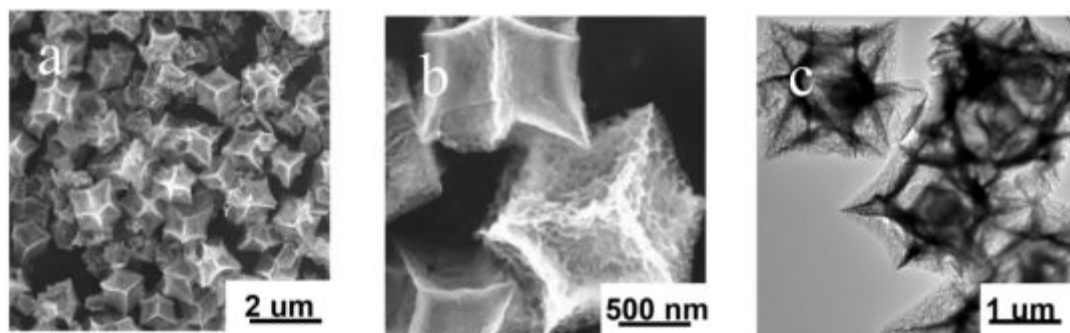

**Figure S7.** (a) SEM image, (b) magnified SEM image and (c)TEM image of QS-Co<sub>3</sub>O<sub>4</sub> HoMSs.

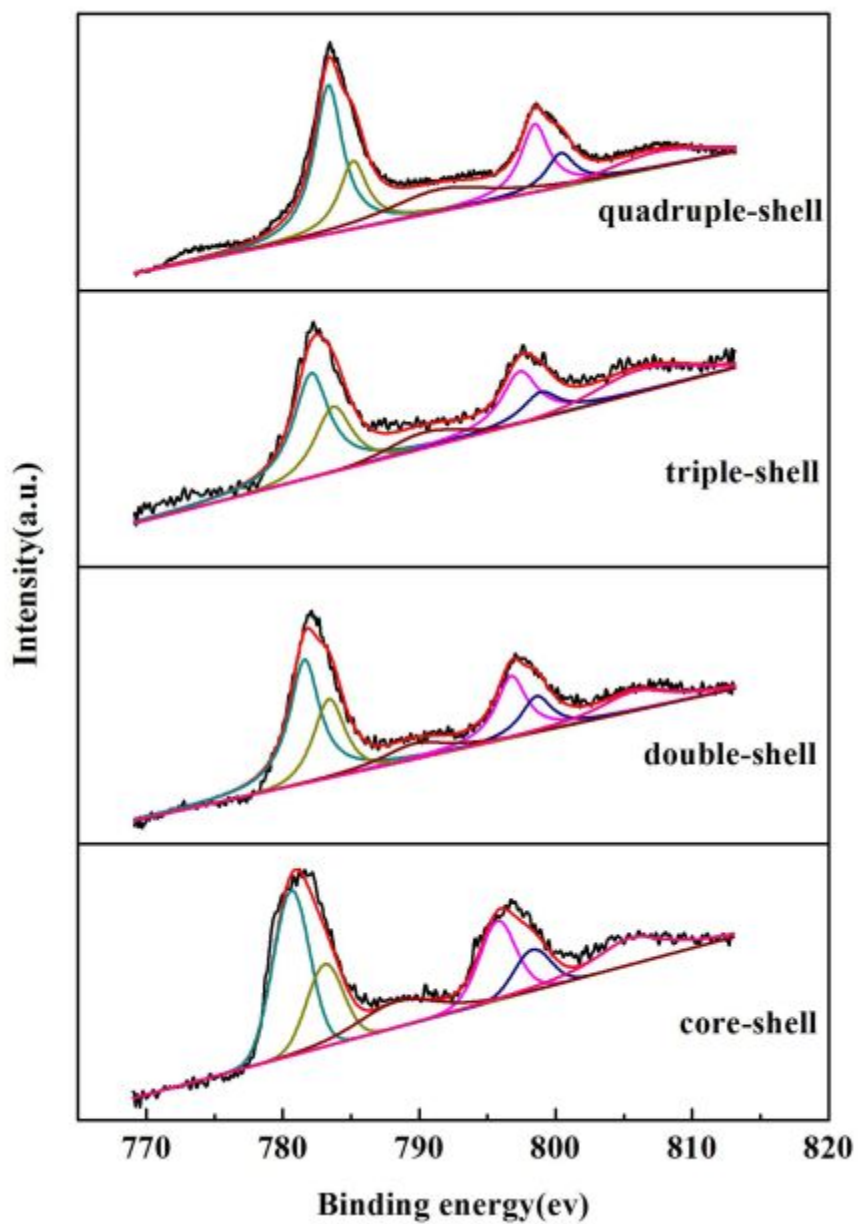

**Figure S8.** XPS spectra of CS, DS, TS and QS Co<sub>3</sub>O<sub>4</sub> HoMSs (ZIF-67).

It can be observed from XPS spectra that there is no composition difference on the surface of CS, DS, TS and QS Co<sub>3</sub>O<sub>4</sub> HoMSs (ZIF-67), and the peak area ratio of Co<sup>2+</sup> and Co<sup>3+</sup> are 1:2.

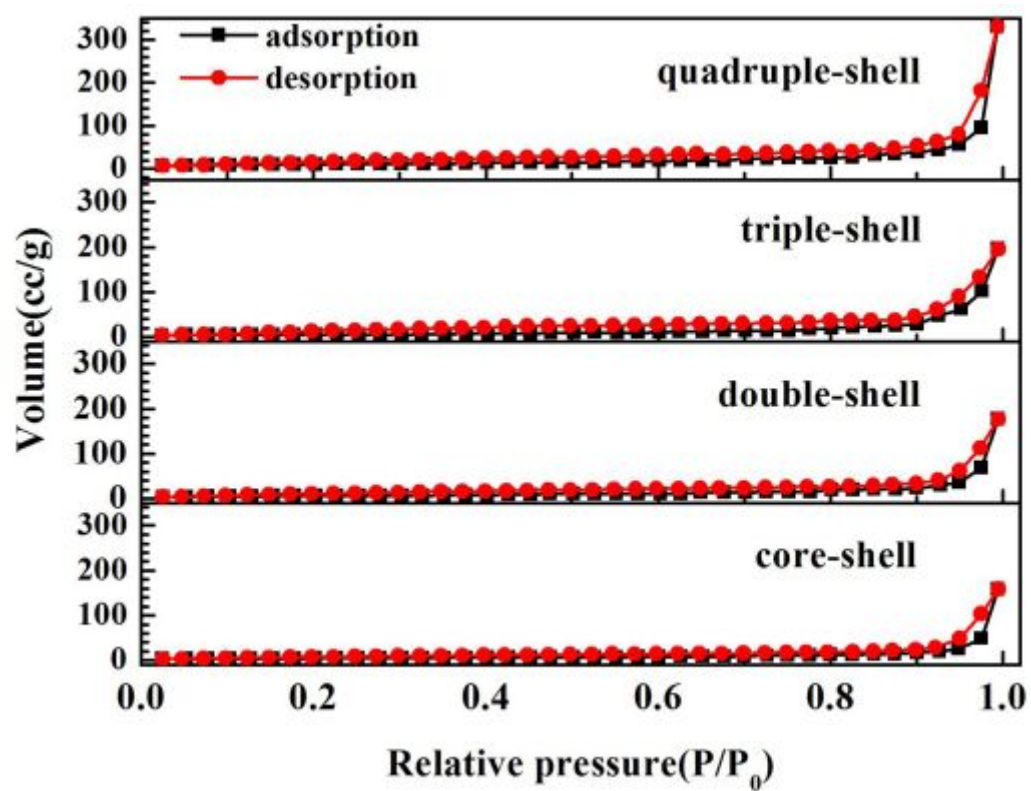

**Figure S9.** the  $\text{N}_2$  adsorption–desorption isotherms of CS, DS, TS and QS  $\text{Co}_3\text{O}_4$  HoMSs (ZIF-67).

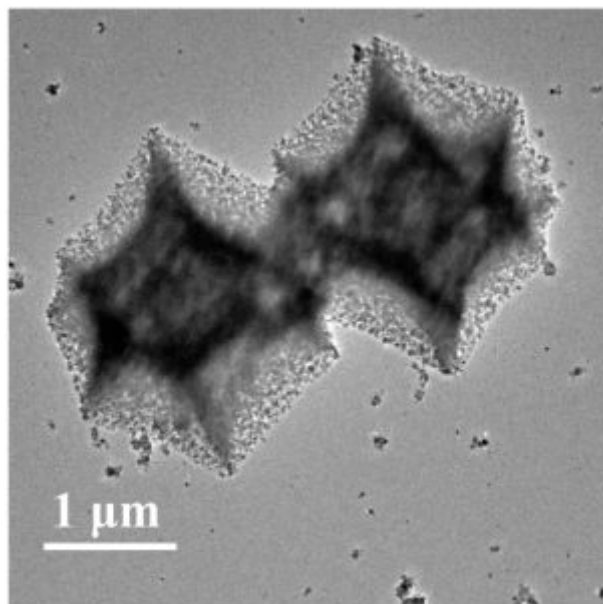

**Figure S10.** TEM image of sample producing by heating in N<sub>2</sub> with 2.5 μm ZIF-67 as the template.

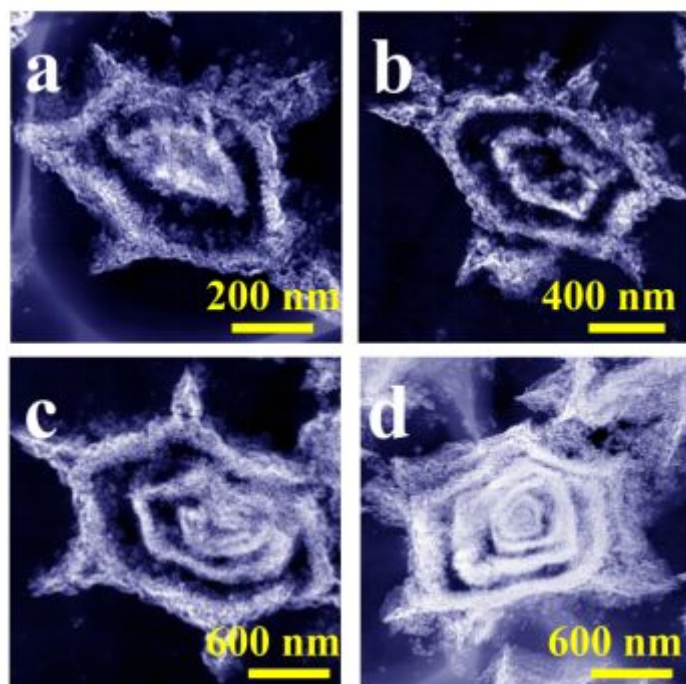

**Figure S11.** STEM images of the slice of (a) CS, (b) DS, (c)TS and (d) QS  $\text{Co}_3\text{O}_4$  (ZIF-67).

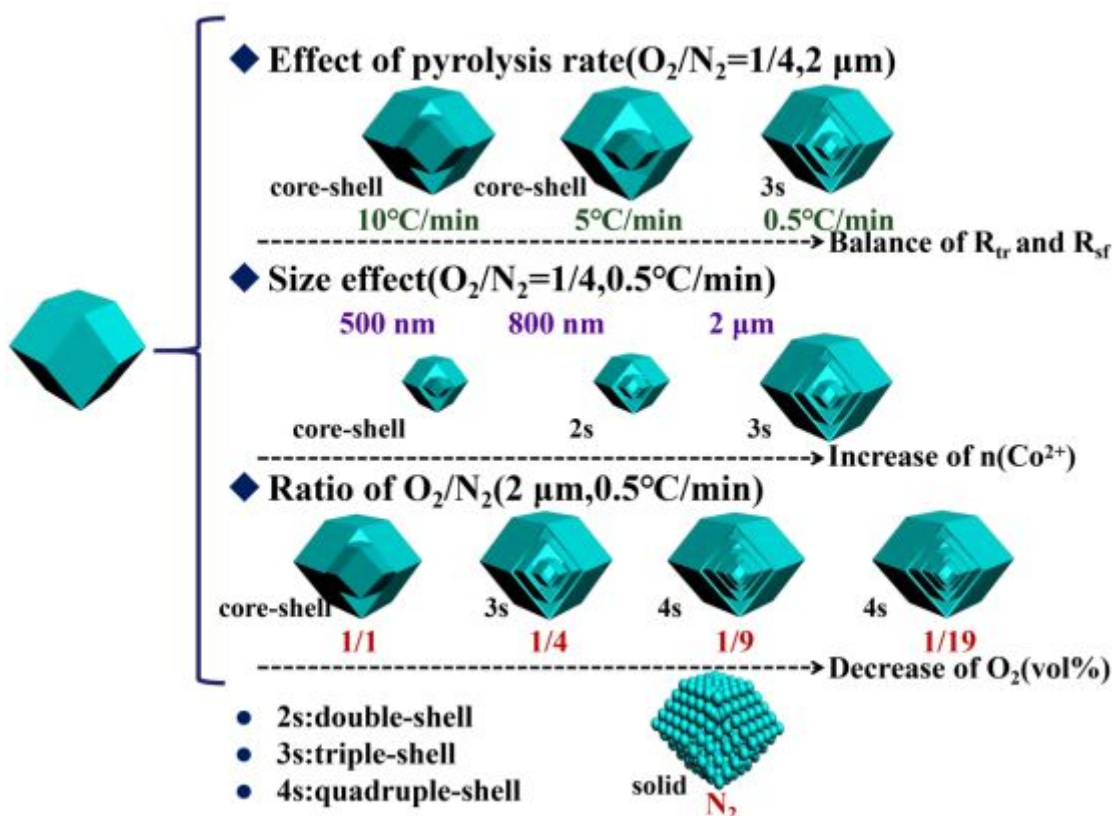

**Figure S12.** Scheme to illustrate the effect of synthesis conditions (heating rate, cobalt ion numbers in ZIF-67 and oxygen volume percentage in the gas) on shell formation.

First, the pyrolysis method of different heating rates was carried out. When the heating rate was  $10^\circ C/min$  and  $5^\circ C/min$ , CS HoMSs were obtained, and at  $0.5^\circ C/min$ , it was TS HoMSs. When the heating rate is too fast, nanoparticles will agglomerate together to form a core. The most shell will be obtained only when the template removal rate  $R_{tr}$  matches with the shell formation rate  $R_{sf}$ . In order to synthesize samples with more shells, we reduce the oxygen volume in the gas, and when  $O_2:N_2=1:9$  and  $1:19$ , we got QS HoMSs.

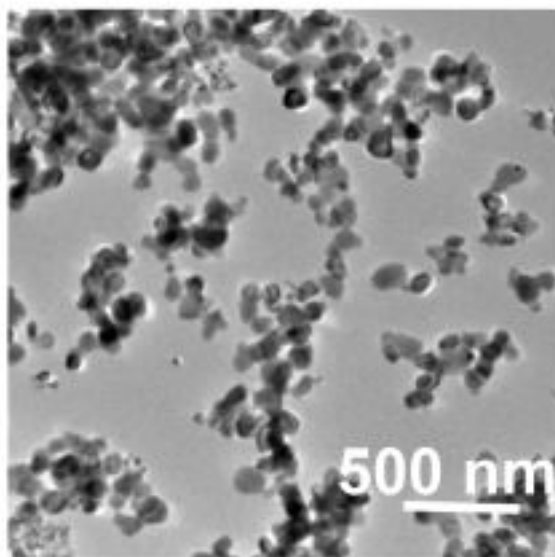

**Figure S13.** TEM image of QS  $\text{Co}_3\text{O}_4$  (ZIF-67) after grinding.



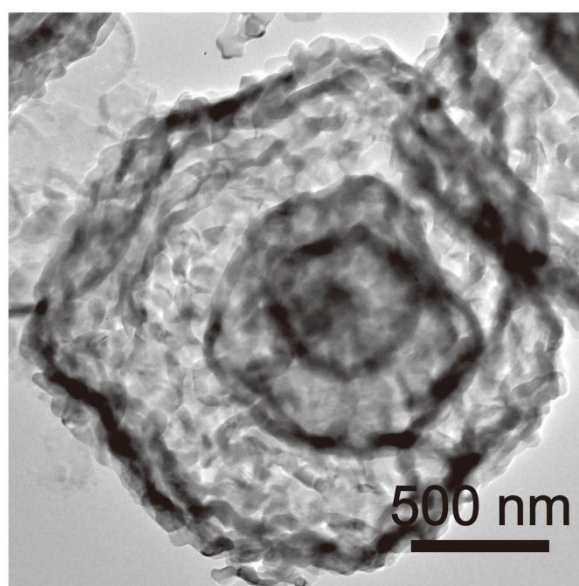

**Figure S14.** TEM image of QS Co<sub>3</sub>O<sub>4</sub> HoMSs (CMS).

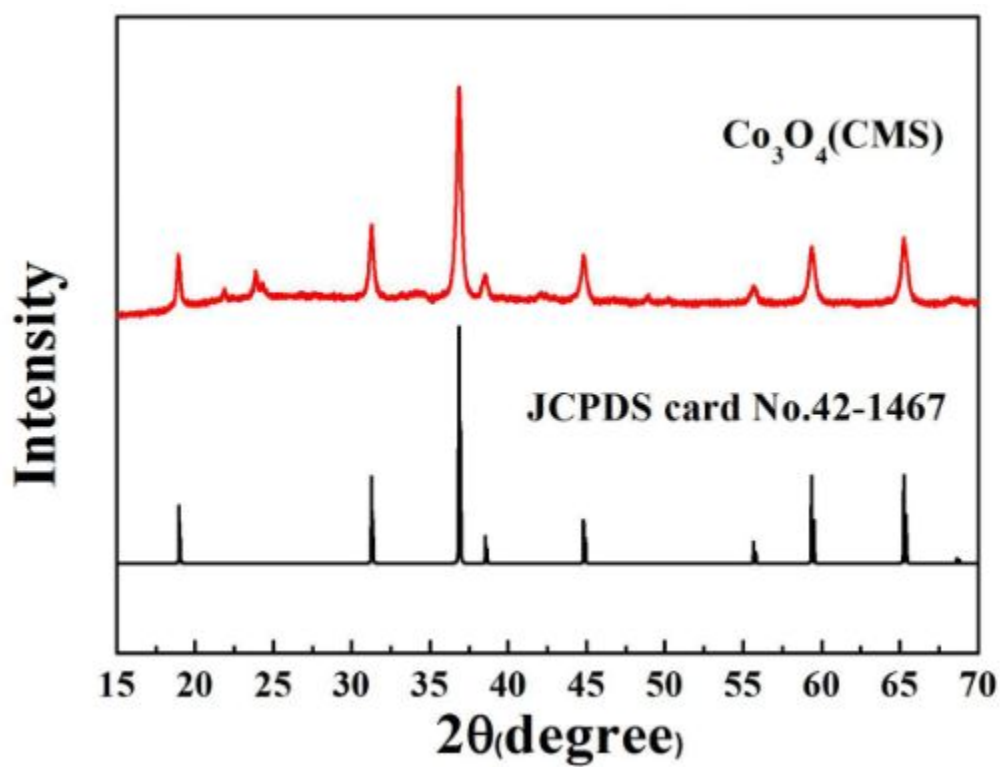

**Figure S15.** XRD patterns of QS  $\text{Co}_3\text{O}_4$  HoMSs (CMS).

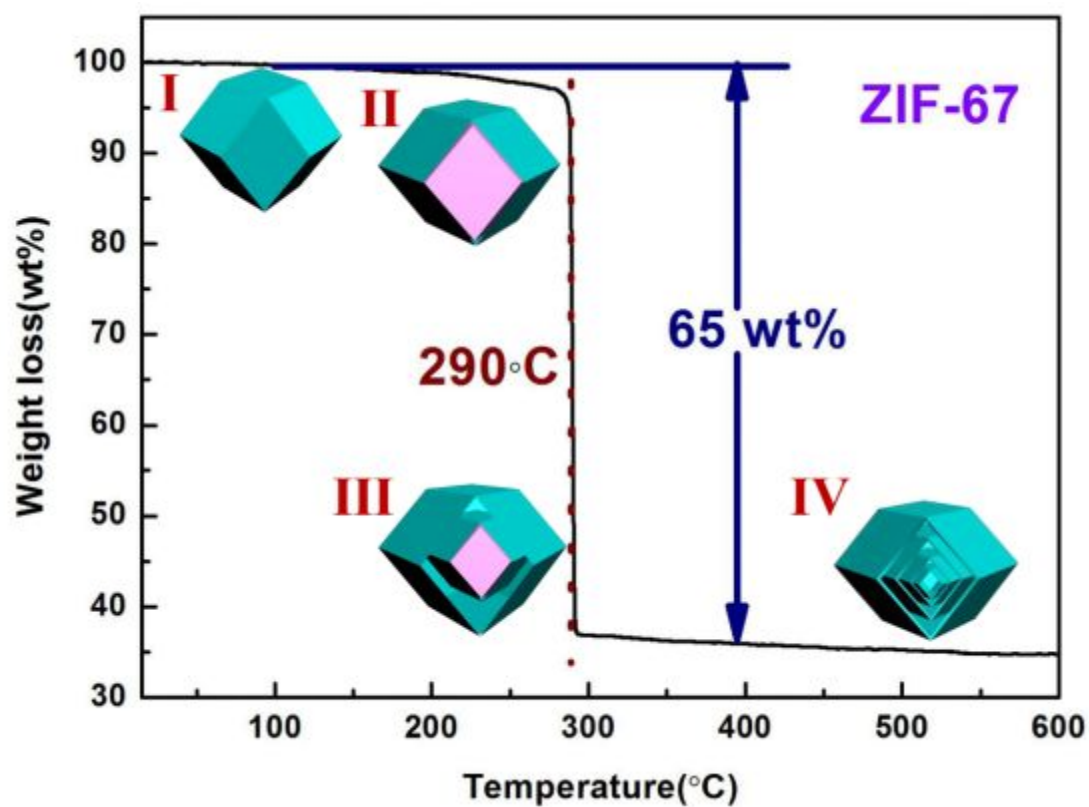

**Figure S16.** TGA curve of ZIF-67.

ZIF-67 had a slow weight loss between 180 and 290 °C, corresponding to the evaporation of water molecules. At 290 °C, rapid weight loss occurred, the plateau of the weight was reached after 65% weight loss, and no mass change occurred after.

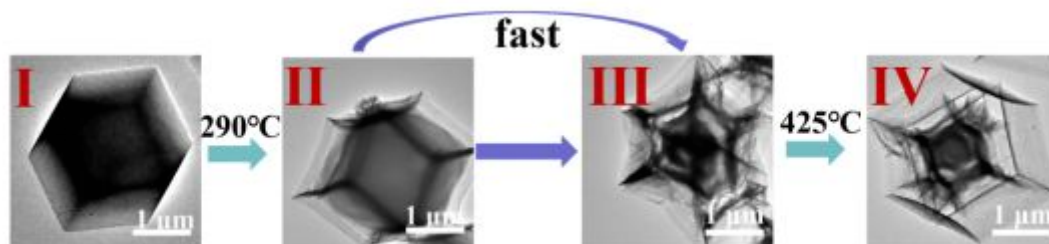

**Figure S17.** TEM images of samples during the reaction process, (I) ZIF-67, (II, III) 290 °C, (IV) 425 °C.

We studied the reaction process by heating 2.5  $\mu\text{m}$  ZIF-67 at 0.5 °C/min to 425 °C under the gas condition of  $\text{O}_2:\text{N}_2=1:9$ , and took three temperature points, corresponding to ( I ) room temperature, ( II , III ) 290 °C (IV) 425 °C, respectively. When the temperature reached 290 °C, outer layer of MOF began to decompose into  $\text{Co}_3\text{O}_4$ , and TS HoMS appear in a very short time. When the temperature rises to 425 °C, a stable QS  $\text{Co}_3\text{O}_4$  HoMSs formed.

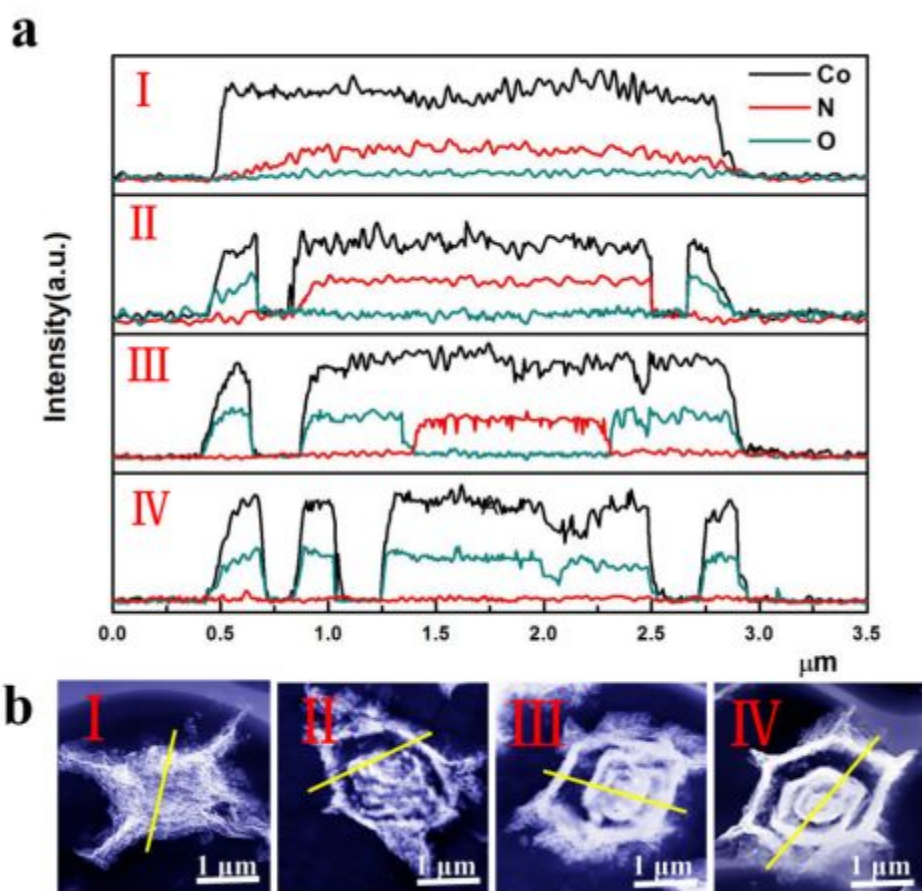

**Figure S18.** (a) STEM images and (b) line scanning of samples during the reaction process.  
 (( I ) ZIF-67, ( II , III ) 290 °C (IV) 425 °C).

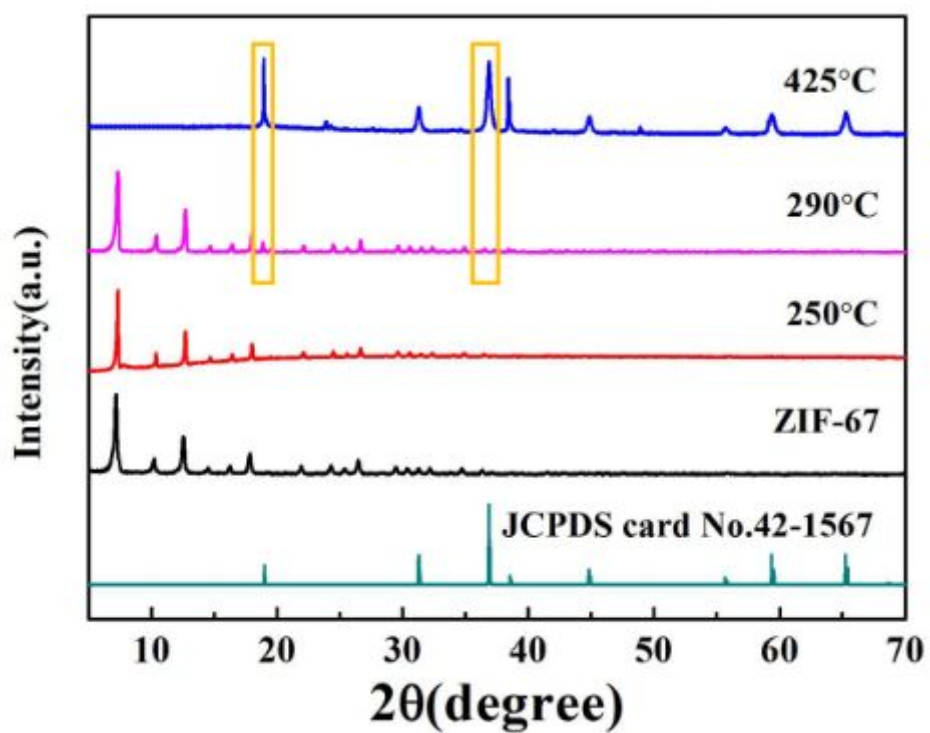

**Figure S19.** XRD patterns of samples during the reaction process, ZIF-67, 250 °C, 290 °C and 425 °C (for TS  $\text{Co}_3\text{O}_4$  HoMSs).

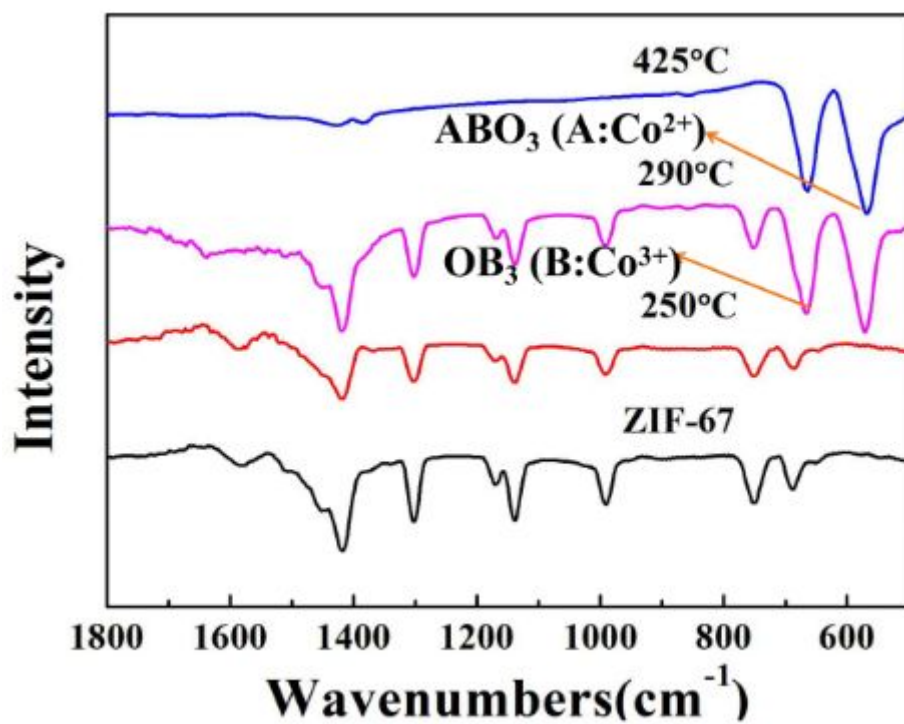

**Figure S20.** FT-IR spectroscopy of samples during the reaction process, ZIF-67, 250 °C, 290 °C and 425 °C.

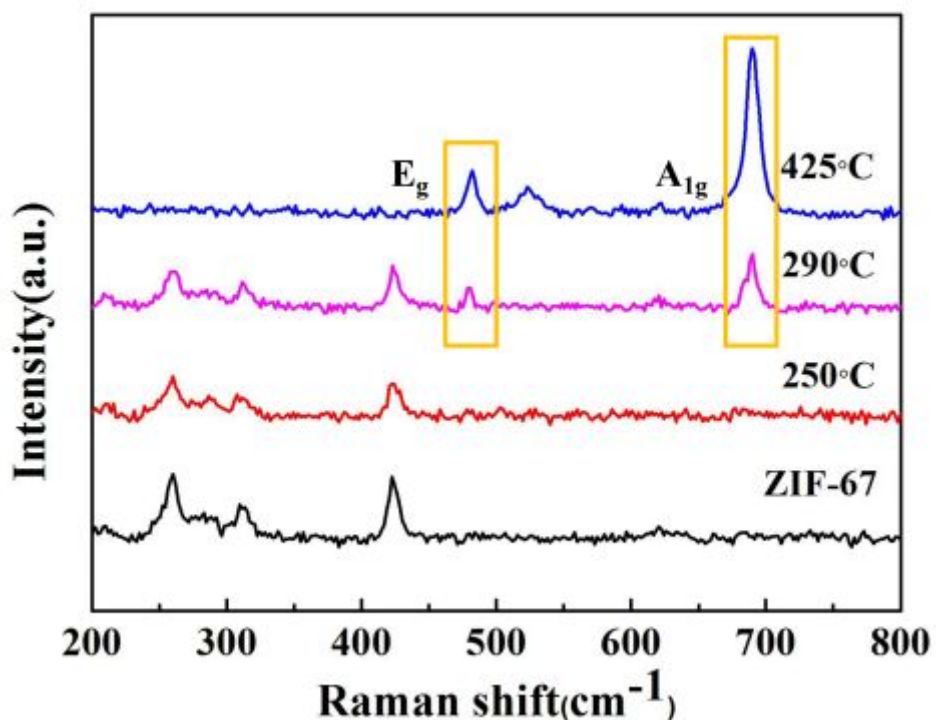

**Figure S21.** Raman spectroscopy of samples during the reaction process, ZIF-67, 250 °C, 290 °C and 425 °C.

Corresponding to the XRD characterization, the Raman characterization also begins to exhibit a vibrational peak of the Co-O bond at a temperature of 290 °C. The prominent Raman peaks correspond to the E<sub>g</sub> (482 cm<sup>-1</sup>) and A<sub>1g</sub> (690 cm<sup>-1</sup>) modes of Co<sub>3</sub>O<sub>4</sub> crystalline phase.<sup>2</sup>



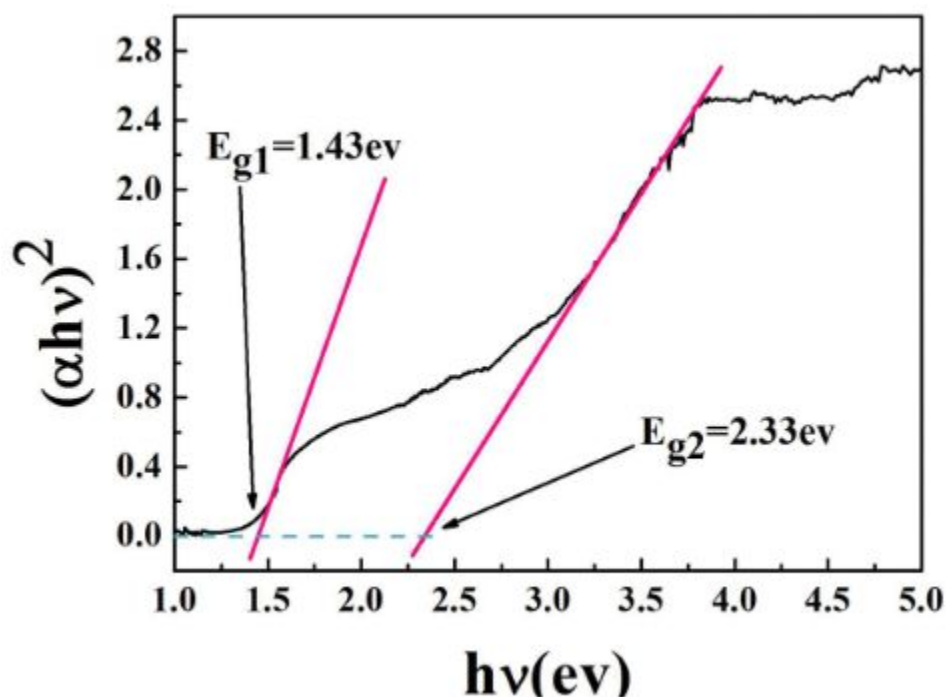

**Figure S22.** Tauc plot of QS Co<sub>3</sub>O<sub>4</sub> (ZIF-67).

The optical band gap of QS Co<sub>3</sub>O<sub>4</sub> (ZIF-67) can be estimated following  $(\alpha h\nu)^{1/n} = A(h\nu - E_g)$ .  $\alpha$  represents the absorption coefficient, and  $h$  is Planck's constant,  $\nu$  represents vibration frequency,  $E_g$  is the band gap of the sample,  $A$  is proportional constant, and  $n$  is related to the nature of the sample transition. As Co<sub>3</sub>O<sub>4</sub> is the direct allowed transition sample,  $n=1/2$  is used in the equation. By making a tangent to the Tauc curve, there are two intersections with the abscissa, and  $E_{g1}$  represents O<sup>2-</sup>-Co<sup>3+</sup> excitation.<sup>2</sup> So the band gap of the sample is 2.33 eV.

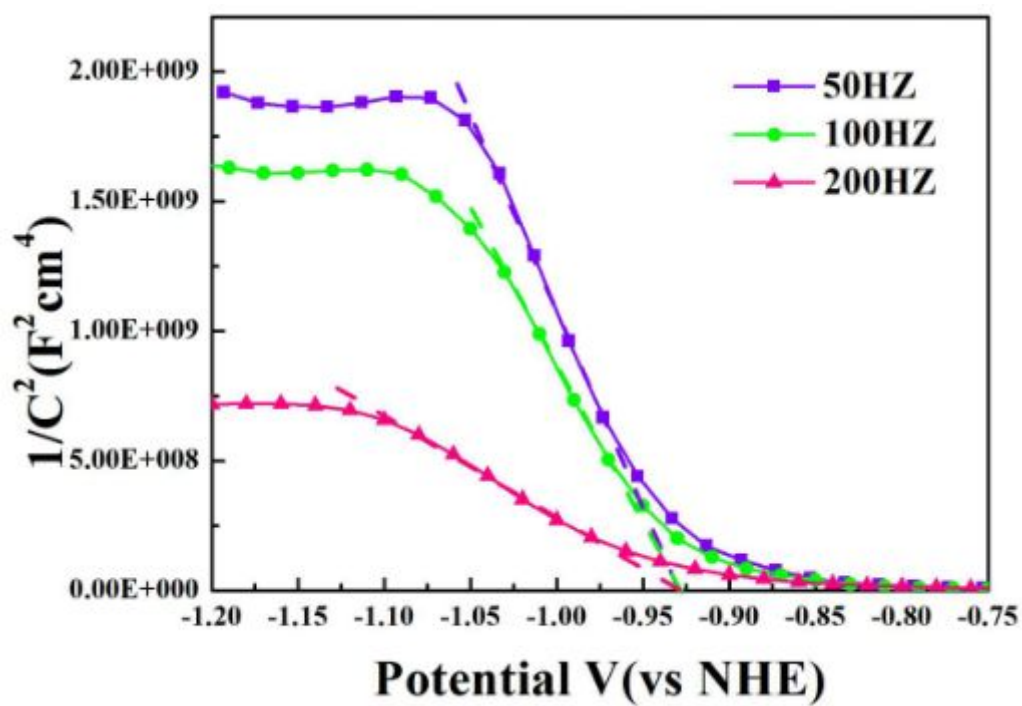

**Figure S23.** Mott-Schottky plot of QS  $\text{Co}_3\text{O}_4$  (ZIF-67).

The conduction band (CB) of the material is determined by Mott-Schottky plots.

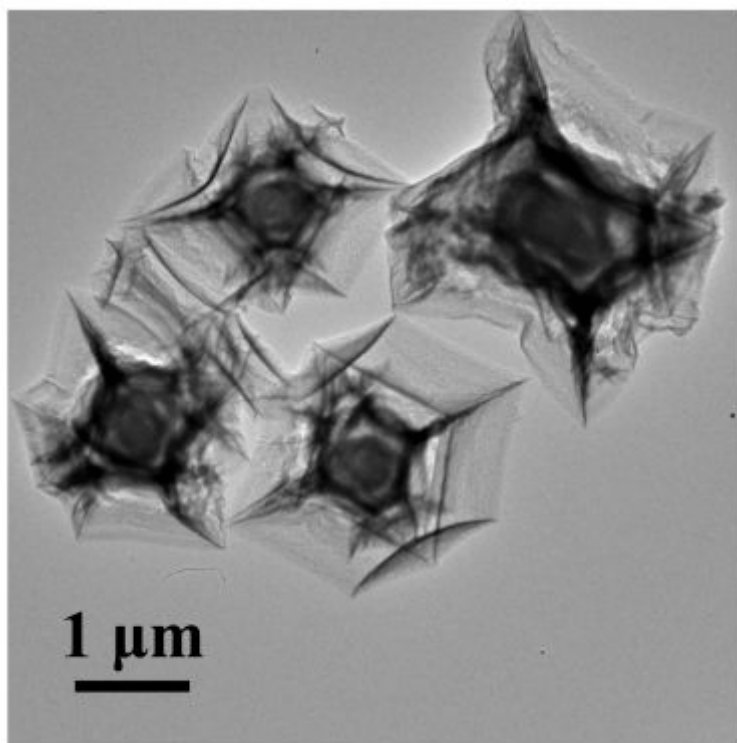

**Figure S24.** TEM image of QS Co<sub>3</sub>O<sub>4</sub> (ZIF-67) after four circles' test.

TEM image of **Figure S24** displays the morphology of the catalysts did not change after catalytic reaction.

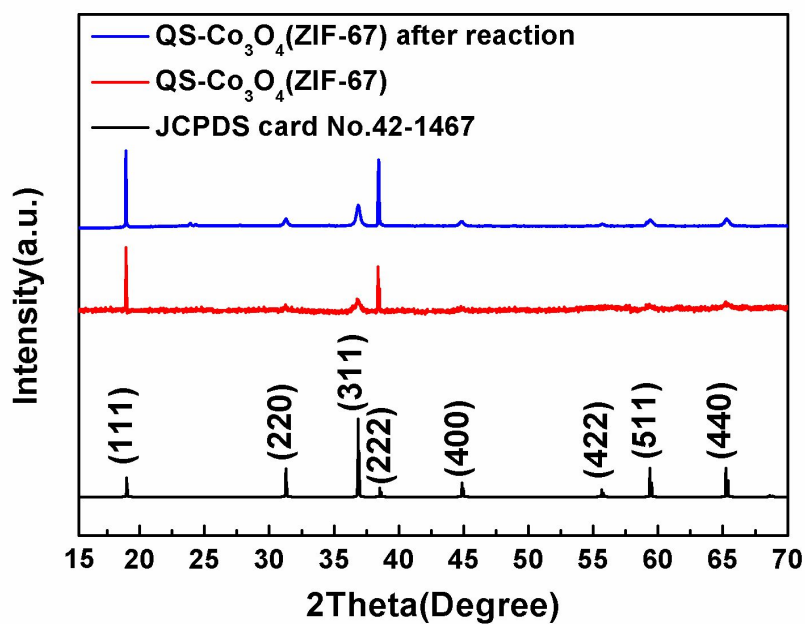

**Figure S25.** XRD patterns of QS Co<sub>3</sub>O<sub>4</sub> (ZIF-67) before and after reaction.

XRD pattern of spent QS-Co<sub>3</sub>O<sub>4</sub> HoMSs (ZIF-67) (**Figure S25**) demonstrates the same crystal structure as the original one.

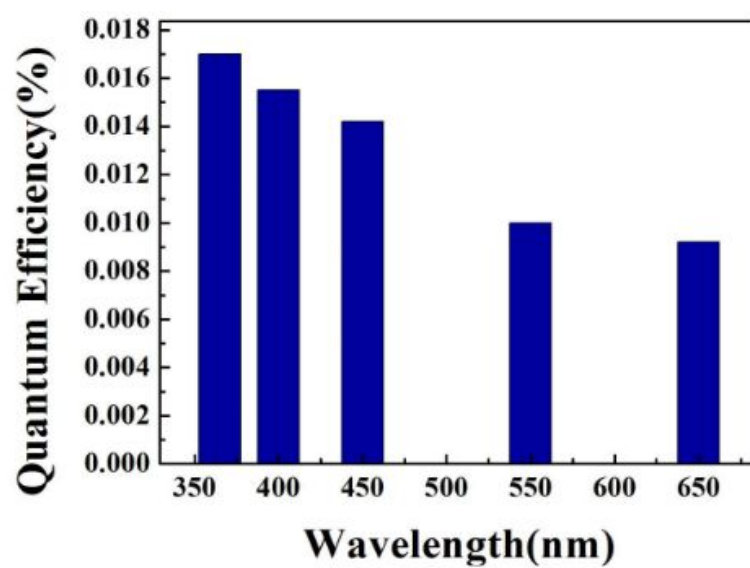

**Figure S26.** External quantum efficiency of QS-Co<sub>3</sub>O<sub>4</sub> (ZIF-67).

**Table S1.** Binding energy of CS, DS, TS and QS Co<sub>3</sub>O<sub>4</sub> (ZIF-67).

| sample | Co <sup>3+</sup> BE/ev |            | Co <sup>2+</sup> BE/ev |            | Co <sup>2+</sup> satellite peak BE/ev |       |
|--------|------------------------|------------|------------------------|------------|---------------------------------------|-------|
| CS     | 780.6<br>3             | 795.7<br>5 | 783.1                  | 798.3      | 788.4                                 | 804.5 |
| DS     | 781.6                  | 796.8<br>7 | 783.4                  | 798.6      | 789.7                                 | 805.8 |
| TS     | 783.3<br>5             | 798.4<br>7 | 785.17                 | 800.3<br>7 | 791.5                                 | 807.6 |
| QS     | 782.1                  | 797.3<br>7 | 783.7                  | 798.9      | 790.4                                 | 806.5 |

**Table S2.** The comparison of CO<sub>2</sub> reduction performance of cobalt oxide-based catalysts in other works.

| Catalyst                                            | Light Source                                   | Photosensitizer                                            | Reaction medium                                                   | Maximum production rate                                                                                                                          | Ref.      |
|-----------------------------------------------------|------------------------------------------------|------------------------------------------------------------|-------------------------------------------------------------------|--------------------------------------------------------------------------------------------------------------------------------------------------|-----------|
| Cu/Co <sub>3</sub> O <sub>4</sub>                   | UV-Vis (Xe)<br>(10 mW cm <sup>-2</sup> )       | -                                                          | 0.1M Na <sub>2</sub> SO <sub>4</sub>                              | 6.75 mmol·L <sup>-1</sup> ·cm <sup>-2</sup> (HCOO <sup>-</sup> )                                                                                 | 3         |
| Co <sub>3</sub> O <sub>4</sub>                      | λ>420 nm (Xe)<br>(293.61 mW cm <sup>-2</sup> ) | [Ru(bpy) <sub>3</sub> ] Cl <sub>2</sub> ·6H <sub>2</sub> O | MeCN/TEOA/H <sub>2</sub> O                                        | CO (3523 μmol·g <sup>-1</sup> ·h <sup>-1</sup> )                                                                                                 | 4         |
| ZnO@Co <sub>3</sub> O <sub>4</sub>                  | UV-Vis (Xe)                                    |                                                            | H <sub>2</sub> O                                                  | CH <sub>4</sub> (0.99 μmol·g <sup>-1</sup> ·h <sup>-1</sup> )                                                                                    | 5         |
| InNbO <sub>4</sub> /Co <sub>3</sub> O <sub>4</sub>  | UV-Vis (Xe)<br>(143.61 mW cm <sup>-2</sup> )   |                                                            | KHCO <sub>3</sub>                                                 | CH <sub>3</sub> OH (1.503 μmol·g <sup>-1</sup> ·h <sup>-1</sup> )                                                                                | 6         |
| Co <sub>3</sub> O <sub>4</sub> /CeO <sub>2</sub>    | λ>400 nm (Xe)                                  |                                                            | Na <sub>2</sub> CO <sub>3</sub> , Na <sub>2</sub> SO <sub>3</sub> | CH <sub>3</sub> OH (1.52 μmol·g <sup>-1</sup> ·h <sup>-1</sup> ), C <sub>2</sub> H <sub>5</sub> OH (4.75 μmol·g <sup>-1</sup> ·h <sup>-1</sup> ) | 7         |
| Co <sub>3</sub> O <sub>4</sub>                      | 510nm<λ<620nm, LED (21W)                       |                                                            | H <sub>2</sub> O                                                  | HCOOH (4.53 μmol·g <sup>-1</sup> ·h <sup>-1</sup> ), HCOH (0.62 μmol·g <sup>-1</sup> ·h <sup>-1</sup> ), CH <sub>3</sub> OH, CO                  | 8         |
| Co <sub>3</sub> O <sub>4</sub>                      | 400nm<λ<1000nm, LED (5W)                       | [Ru(bpy) <sub>3</sub> ] Cl <sub>2</sub> ·6H <sub>2</sub> O | MeCN/TEOA/H <sub>2</sub> O                                        | CO (4.52 μmol·g <sup>-1</sup> ·h <sup>-1</sup> )                                                                                                 | 9         |
| Co <sub>3</sub> O <sub>4</sub>                      | UV-Vis (Xe)<br>(100.61 mW cm <sup>-2</sup> )   |                                                            | H <sub>2</sub> O                                                  | MeOH                                                                                                                                             | 10        |
| QS-Co <sub>3</sub> O <sub>4</sub><br>HoMSs (ZIF-67) | AM 1.5G                                        | -                                                          | H <sub>2</sub> O                                                  | CO (46.3 μmol·g <sup>-1</sup> ·h <sup>-1</sup> )                                                                                                 | This work |

**Table S3.** Analog resistance of samples corresponding to the EIS Nyquist plots.

|                    | NPs   | CS<br>(ZIF-67) | DS<br>(ZIF-67) | TS<br>(ZIF-67) | QS<br>(ZIF-67) | QS<br>(CMS) | QS (ZIF-67)<br>after grinding |
|--------------------|-------|----------------|----------------|----------------|----------------|-------------|-------------------------------|
| R2<br>( $\Omega$ ) | 26.72 | 20.84          | 16.01          | 13.97          | 11.63          | 24.28       | 24.86                         |



## References:

- (1) Wang, J.; Yang, N.; Tang, H.; Dong, Z.; Jin, Q.; Yang, M.; Kisailus, D.; Zhao, H.; Tang, Z.; Wang, D. Accurate Control of Multishelled  $\text{Co}_3\text{O}_4$  Hollow Microspheres as High-Performance Anode Materials in Lithium-Ion Batteries. *Angew. Chem. Int. Ed.* **2013**, 125, 6545-6548.
- (2) Chih, W. T.; Chen, B. W.; Shu, H. C. Characterization of Cobalt Oxides Studied by FT-IR, Raman, TPR and TG-MS. *Thermochim. Acta* **2008**, 473, 68-73.
- (3) Shen, Q.; Chen, Z.; Huang, X.; Liu, M.; Zhao, G.; High-Yield and Selective Photoelectrocatalytic Reduction of  $\text{CO}_2$  to Formate by Metallic Copper Decorated  $\text{Co}_3\text{O}_4$  Nanotube Arrays. *Environ. Sci. Technol.* **2015**, 49, 5828-5835.
- (4) Gao, C.; Meng, Q.; Zhao, K.; Yin, H.; Wang, D.; Guo, J.; Zhao, S.; Chang, L.; He, Meng.; Li, Q.; Zhao, H.; Huang, X.; Gao, Y.; Tang, Z.  $\text{Co}_3\text{O}_4$  Hexagonal Platelets with Controllable Facets Enabling Highly Efficient Visible-Light Photocatalytic Reduction of  $\text{CO}_2$ . *Adv. Mater.* **2016**, 28, 6485-6490.
- (5) Wang, T.; Shi, L.; Tang, J.; Malgras, V.; Asahina, S.; Liu, G.; Zhang, H.; Meng, X.; Chang, K.; He, J.; Terasaki, O.; Yamauchi, Y.; Ye, J. A  $\text{Co}_3\text{O}_4$ -Embedded Porous  $\text{ZnO}$  Rhombic Dodecahedron Prepared Using Zeolitic Imidazolate Frameworks as Precursors for  $\text{CO}_2$  Photoreduction. *Nanoscale* **2016**, 8, 6712-6720.
- (6) Lee, D.; Chen, H.; Chen, Y. Photocatalytic Reduction of Carbon Dioxide with Water Using  $\text{InNbO}_4$  Catalyst with  $\text{NiO}$  and  $\text{Co}_3\text{O}_4$  Cocatalysts. *J. Phys. Chem. Solids* **2012**, 73, 661-669.
- (7) Huang, Y.; Yan, C.; Guo, C.; Huang, S. Enhanced Photoreduction Activity of Carbon Dioxide over  $\text{Co}_3\text{O}_4/\text{CeO}_2$  Catalysts under Visible Light Irradiation. *Int. J. Photoenergy* **2015**, 230808.
- (8) Mendoza, J.; Kim, H.; Park, H.; Park, K. Photocatalytic Reduction of Carbon Dioxide Using  $\text{Co}_3\text{O}_4$  Nanoparticles under Visible Light Irradiation. *Korean J. Chem. Eng.* **2012**, 29, 1483-1486.
- (9) Chen, W.; Han, B.; Tian, C.; Liu, X.; Liang, S.; Deng, H.; Lin, Z. MOFs-Derived Ultrathin Holey  $\text{Co}_3\text{O}_4$  Nanosheets for Enhanced Visible Light  $\text{CO}_2$  Reduction. *Appl. Catal. B Environ.* **2019**, 244, 996-1003.

(10) Pocoví-Martínez, S.; Zumeta-Dube, I.; Diaz, D. Production of Methanol from Aqueous CO<sub>2</sub> by Using Co<sub>3</sub>O<sub>4</sub> Nanostructures as Photocatalysts. *J. Nanomater.* **2019**, 6461493.
